# Supplementary material
Source: publisher figshare collection journal article supplement (https://karger.figshare.com/ndownloader/files/28849830)
Supplement: Supplementary file 1 [file 28849830]

**Supplemental Material**

Supplemental Figure.1. Manhattan plot for genetic associations with HbA1c levels for GWAs (gray dots) and candidate gene (black dots) approaches.

Supplemental Figure 1. HbA1c Prediction Model predicted vs. observed values.
